# Supplementary material
Source: PubMed Central journal article supplement (PMC3754660)
Supplement: JCM.01455-13_zjm999092777so1.pdf [file JCM.01455-13_zjm999092777so1.pdf]

**Table S1** The detailed information regarding strains tested in this study

| Species/Cryptic species<br>/Strain | Source            | Geographical Origin | Reference |
|------------------------------------|-------------------|---------------------|-----------|
| <b><i>C. gattii</i></b>            |                   |                     |           |
| <b>VGI genotype</b>                |                   |                     |           |
| WM179                              | CSF               | Australia           | 1         |
| WM276                              | <i>Eucalyptus</i> | Australia           | 2         |
| B5242                              | Clinical          | USA                 | 2         |
| E286                               | Environmental     | Australia           | 2         |
| RV66095                            | CSF               | Brazil              | 3         |
| RV3463                             | CSF               | Belgium             | 3         |
| RV66536                            | Clinical          | Brazil              | 3         |
| XH111                              | Mouse brain       | North West China    | 3         |
| RV8001                             | CSF               | Belgium             | 3         |
| RV52641                            | NA                | Belgium             | 3         |
| XH3                                | CSF               | East China          | 3         |
| XH4                                | CSF               | East China          | 3         |
| XH5                                | CSF               | East China          | 3         |
| XH23                               | CSF               | East China          | 3         |
| XH24                               | CSF               | East China          | 3         |
| XH31                               | CSF               | East China          | 3         |
| XH32                               | Sputum            | East China          | 3         |
| XH72                               | CSF               | East China          | 3         |
| XH133                              | Clinical          | South China         | 4         |
| E566                               | <i>Eucalyptus</i> | Australia           | 2         |
| E276                               | <i>Eucalyptus</i> | Australia           | 2         |
| E312                               | <i>Eucalyptus</i> | Australia           | 2         |
| E554                               | <i>Eucalyptus</i> | Australia           | 2         |
| C2077                              | Environmental     | Australia           | 2         |
| NT-2                               | Clinical          | Australia           | 2         |
| RV20186                            | CSF               | Zaire               | 2         |
| B4492                              | Clinical          | Cambodia            | 2         |
| R794                               | Clinical          | Canada              | 2         |
| F2863                              | Porpoise          | Canada              | 2         |
| KB7892                             | Arbutus           | Canada              | 2         |
| <b>VGII genotype</b>               |                   |                     |           |
| NIH444                             | Clinical          | USA                 | 2         |
| R265                               | Clinical          | Vancouver           | 2         |
| ICB179                             | Environmental     | Brazil              | 2         |
| WM178                              | Lung              | Australia           | 1         |
| XH91                               | CSF               | South China         | 3         |
| R272                               | Clinical          | Vancouver           | 2         |

| Species/Cryptic species<br>/Strain | Source            | Geographical Origin | Reference |
|------------------------------------|-------------------|---------------------|-----------|
| 2003/125                           | Clinical          | France              | 2         |
| CBS1930                            | Veterinary        | Aruba               | 2         |
| CBS10090                           | Clinical          | Greece              | 4         |
| XH156                              | CSF               | South China         | 4         |
| LA584                              | Clinical          | Colombia            | 5         |
| ICB180                             | Environmental     | Brazil              | 2         |
| RDH-2                              | Clinical          | Australia           | 2         |
| EJB12                              | Clinical          | USA                 | 5         |
| CBS8684                            | Environmental     | Uruguay             | 2         |
| 2004/335                           | Clinical          | French Guyana       | 2         |
| ICB97                              | Clinical          | Brazil              | 2         |
| 99/901-2                           | Clinical          | France              | 2         |
| EJB10                              | Clinical          | USA                 | 5         |
| EJB6                               | Clinical          | USA                 | 5         |
| <b>VGIII genotype</b>              |                   |                     |           |
| WM161                              | <i>Eucalyptus</i> | USA                 | 1         |
| NIH179                             | Clinical          | NA                  | 2         |
| MAS92-0409                         | NA                | USA                 | 2         |
| NIH836                             | Clinical          | NA                  | 2         |
| NIH312                             | CSF               | USA                 | 2         |
| RV45184                            | NA                | Belgium             | 3         |
| B4546                              | Clinical          | NA                  | 2         |
| NIH191                             | Clinical          | USA                 | 2         |
| NIH198                             | Clinical          | NA                  | 2         |
| ICB108                             | Clinical          | Brazil              | 2         |
| MEX240                             | Clinical          | Mexico              | 6         |
| CA1573                             | Clinical          | USA                 | 6         |
| 97/433                             | Clinical          | Mexico              | 6         |
| DUMC139.97                         | Clinical          | Colombia            | 2         |
| CA1521                             | Clinical          | USA                 | 6         |
| B13C                               | Clinical          | Asia                | 2         |
| 62270/571_159                      | Veterinary        | Australia           | 2         |
| CA2318                             | Clinical          | USA                 | 6         |
| <b>VGIV genotype</b>               |                   |                     |           |
| WM779                              | Cheata            | South Africa        | 1         |
| MMRL2872                           | Clinical          | Botswana            | 2         |
| MMRL2874                           | Clinical          | Botswana            | 2         |
| MMRL2980                           | Clinical          | Botswana            | 2         |
| MMRL2933                           | Clinical          | Botswana            | 2         |
| YD48                               | NA                | Italy               | 3         |

| Species/Cryptic species /Strain | Source        | Geographical Origin | Reference |
|---------------------------------|---------------|---------------------|-----------|
| M391                            | Clinical      | Malawi              | 2         |
| M250                            | Clinical      | Malawi              | 2         |
| B5748                           | Clinical      | India               | 2         |
| MMRL2879                        | Clinical      | Botswana            | 2         |
| MMRL3013                        | Clinical      | Botswana            | 2         |
| MMRL2924                        | Clinical      | Botswana            | 2         |
| <b><i>C. neoformans</i></b>     |               |                     |           |
| WM148                           | CSF           | Australia           | 1         |
| H99                             | CSF           | USA                 | 3         |
| IUM96-2828                      | Environmental | Italy               | 3         |
| Bt130                           | Clinical      | Botswana            | 3         |
| KN99                            | Laboratory    | USA                 | 3         |
| Bt88                            | CSF           | Botswana            | 3         |
| WM626                           | CSF           | Australia           | 1         |
| 571-152                         | Cat           | Australia           | 3         |
| ATCC34874                       | Laboratory    | USA                 | 3         |
| JEC20                           | Laboratory    | USA                 | 3         |
| WM629                           | Blood         | Australia           | 1         |
| NIH433                          | Environmental | Denmark             | 3         |
| RV33370                         | Clinical      | Belgium             | 3         |
| WM628                           | CSF           | Australia           | 1         |
| 42-10                           | Environmental | USA                 | 3         |
| IUM92-6198                      | NA            | Italy               | 3         |
| <b><i>C. laurentii</i></b>      |               |                     |           |
| RV30994                         | NA            | Belgium             | 4         |
| Y-2536                          | Palm wine     | NRRL                | 4         |
| <b><i>C. albidus</i></b>        |               |                     |           |
| Y-2090                          | Sputum        | NRRL                | 4         |
| XH268                           | Skin lesion   | East China          | 4         |
| <b><i>C. uniguttulatus</i></b>  |               |                     |           |
| XH236                           | Nail          | East China          | 4         |
| XH284                           | Nail          | East China          | 4         |
| XH358                           | Mucosa        | East China          | 4         |
| <b><i>S. cerevisiae</i></b>     |               |                     |           |
| W303-1A                         | Lab           | Slovak Republic     | 4         |
| XH248                           | Nail          | East China          | 4         |

| Species/Cryptic species /Strain | Source       | Geographical Origin | Reference |
|---------------------------------|--------------|---------------------|-----------|
| <b><i>T. asahii</i></b>         |              |                     |           |
| Y-17953                         | Clinical     | NRRL                | 4         |
| XH196                           | Urine        | South China         | 4         |
| <b><i>R. mucilaginosa</i></b>   |              |                     |           |
| Y-2510                          | NA           | NRRL                | 4         |
| XH299                           | Blood        | South China         | 4         |
| XH300                           | Blood        | South China         | 4         |
| <b><i>C. albicans</i></b>       |              |                     |           |
| ATCC10231                       | Clinical     | ATCC                | 4         |
| ATCC11006                       | Clinical     | ATCC                | 4         |
| XH183                           | Drain        | South China         | 4         |
| XH186                           | Bile         | South China         | 4         |
| XH312                           | Ascites      | South China         | 4         |
| <b><i>C. glabrata</i></b>       |              |                     |           |
| ATCC90030                       | Blood        | USA                 | 4         |
| 2086                            | Faeces       | Italy               | 4         |
| XH390                           | Vaginal      | East China          | 4         |
| <b><i>C. tropicalis</i></b>     |              |                     |           |
| ATCC750                         | Bronchus     | ATCC                | 4         |
| XH185                           | Urine        | South China         | 4         |
| XH393                           | Sputum       | East China          | 4         |
| <b><i>C. parapsilosis</i></b>   |              |                     |           |
| CBS604                          | Sprue        | Puerto Rico         | 4         |
| XH313                           | CVC          | South China         | 4         |
| XH309                           | Blood        | South China         | 4         |
| <b><i>C. krusei</i></b>         |              |                     |           |
| ATCC6258                        | Sputum       | Sri Lanka           | 4         |
| XH318                           | Nail         | East China          | 4         |
| <b><i>C. guilliermondii</i></b> |              |                     |           |
| CBS2030                         | Insect frass | USA                 | 4         |
| Y-324                           | Sputum       | NRRL                | 4         |
| YB-231                          | Infected ear | NRRL                | 4         |
| <b><i>C. lusitaniae</i></b>     |              |                     |           |
| Y-5393                          | Sputum       | NRRL                | 4         |

| Species/Cryptic species /Strain | Source         | Geographical Origin | Reference |
|---------------------------------|----------------|---------------------|-----------|
| XH224                           | Nail           | East China          | 4         |
| XH200                           | Sputum         | South China         | 4         |
| <i>C. kefyri</i>                |                |                     |           |
| Y-2415                          | Yogurt         | NRRL                | 4         |
| XH297                           | Urine          | South China         | 4         |
| <i>C. famata</i>                |                |                     |           |
| Y-17914                         | Mycotic lesion | NRRL                | 4         |
| XH209                           | Skin           | East China          | 4         |
| <i>C. rugosa</i>                |                |                     |           |
| Y-95                            | Feces          | NRRL                | 4         |
| XH205                           | Urine          | South China         | 4         |

NA, not available

#### References

1. Meyer W, Castaneda A, Jackson S, Huynh M, Castaneda E. 2003. Molecular typing of IberoAmerican *Cryptococcus neoformans* isolates. *Emerg. Infect. Dis.* **9**:189-195.
2. Fraser JA, Giles SS, Wenink EC, Geunes-Boyer SG, Wright JR, Diezmann S, Allen A, Stajich JE, Dietrich FS, Perfect JR, Heitman J. 2005. Same-sex mating and the origin of the Vancouver Island *Cryptococcus gattii* outbreak. *Nature* **437**:1360-1364.
3. Feng X, Yao Z, Ren D, Liao W. 2008. Simultaneous identification of molecular and mating types within the *Cryptococcus* species complex by PCR-RFLP analysis. *J. Med. Microbiol.* **57**:1481-1490.
4. Feng X, Fu X, Ling B, Wang L, Liao W, Yao Z. 2013. Development a singleplex PCR assay for rapid identification and differentiation of *Cryptococcus neoformans* var. *grubii*, *Cryptococcus neoformans* var. *neoformans*, *Cryptococcus gattii* and hybrids. *J. Clin. Microbiol.* **51**:1920-1923.
5. Byrnes ER, Li W, Lewit Y, Ma H, Voelz K, Ren P, Carter DA, Chaturvedi V, Bildfell RJ, May RC, Heitman J. 2010. Emergence and pathogenicity of highly virulent *Cryptococcus gattii* genotypes in the northwest United States. *PLoS Pathog.* **6**:e1000850.
6. Byrnes ER, Li W, Ren P, Lewit Y, Voelz K, Fraser JA, Dietrich FS, May RC, Chaturvedi S, Chaturvedi V, Heitman J. 2011. A diverse population of *Cryptococcus gattii* molecular type VGIII in southern Californian HIV/AIDS patients. *PLoS Pathog.* **7**:e1002205.
